# Supplementary material
Source: publisher figshare collection journal article supplement (https://gsajournals.figshare.com/articles/dataset/_/7670699)

# Hollerer et al. Figure S6

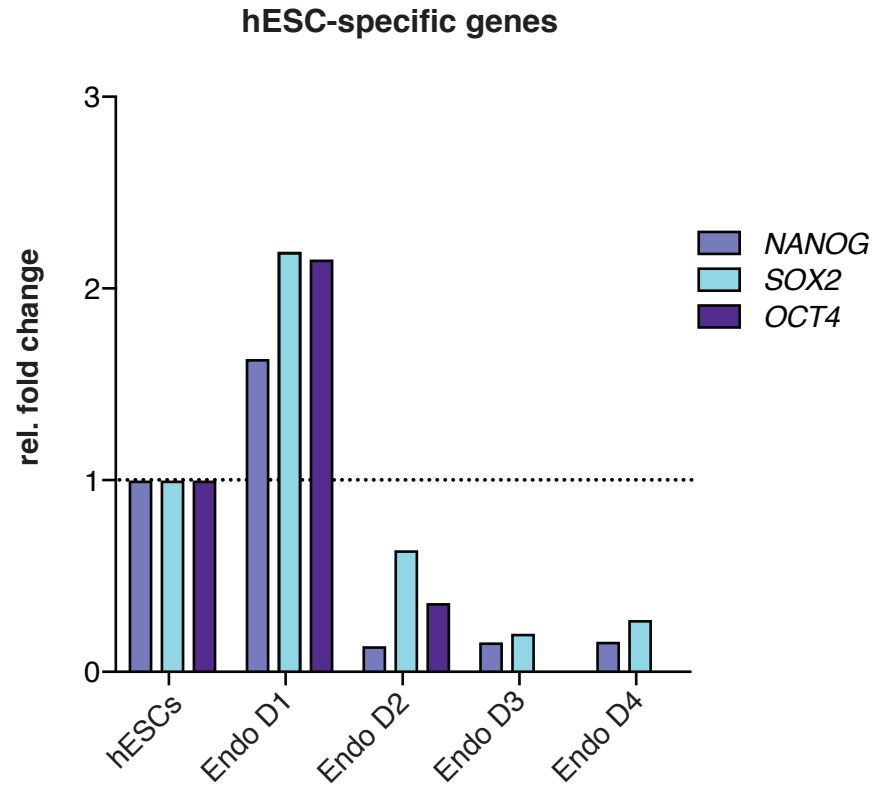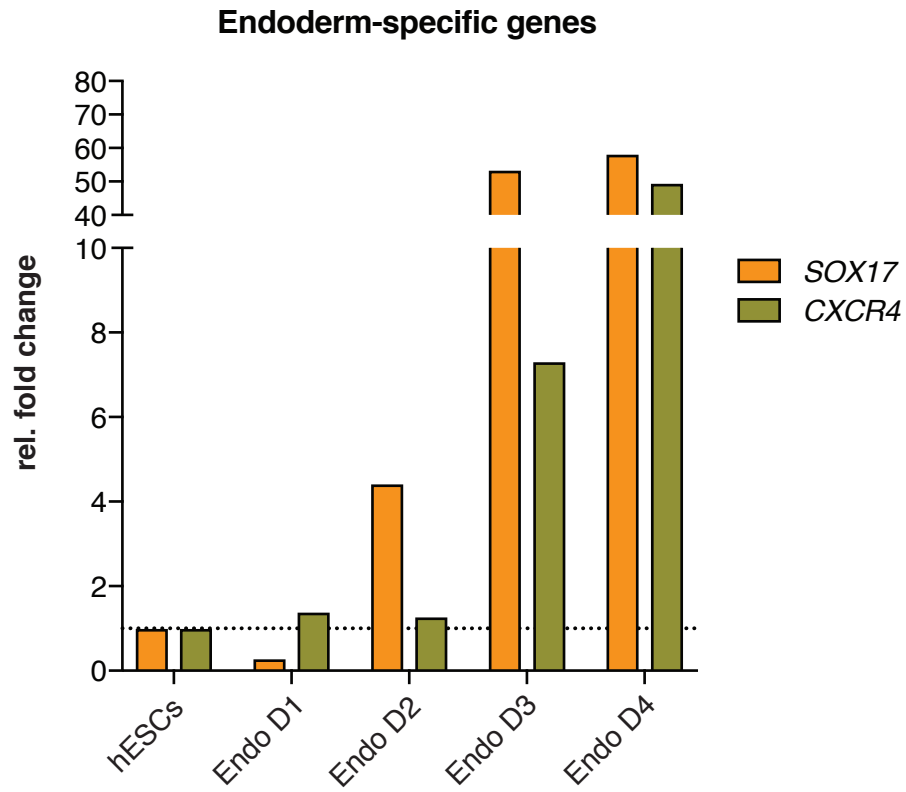

Supplement: Supplementary file 1 [file 1]

# Hollerer et al. Figure S1

*MDM2* gene locus

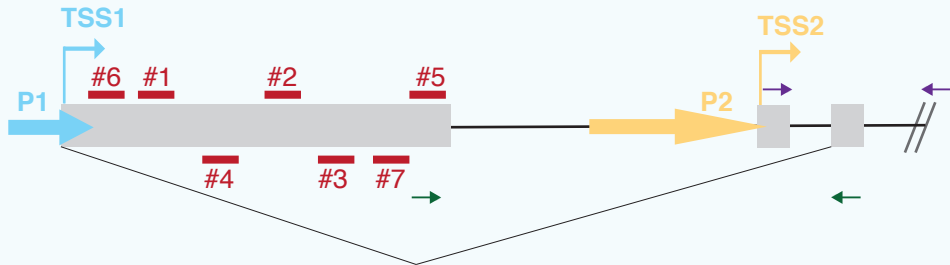

Supplement: Supplementary file 2 [file 1]

**A**
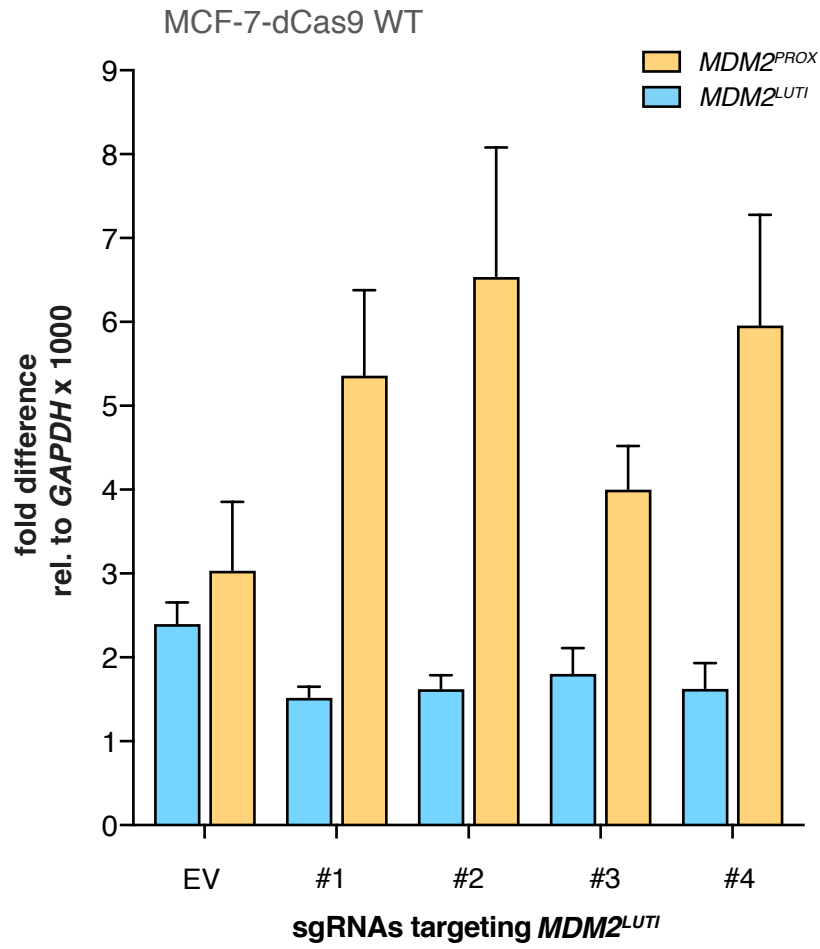
**B**
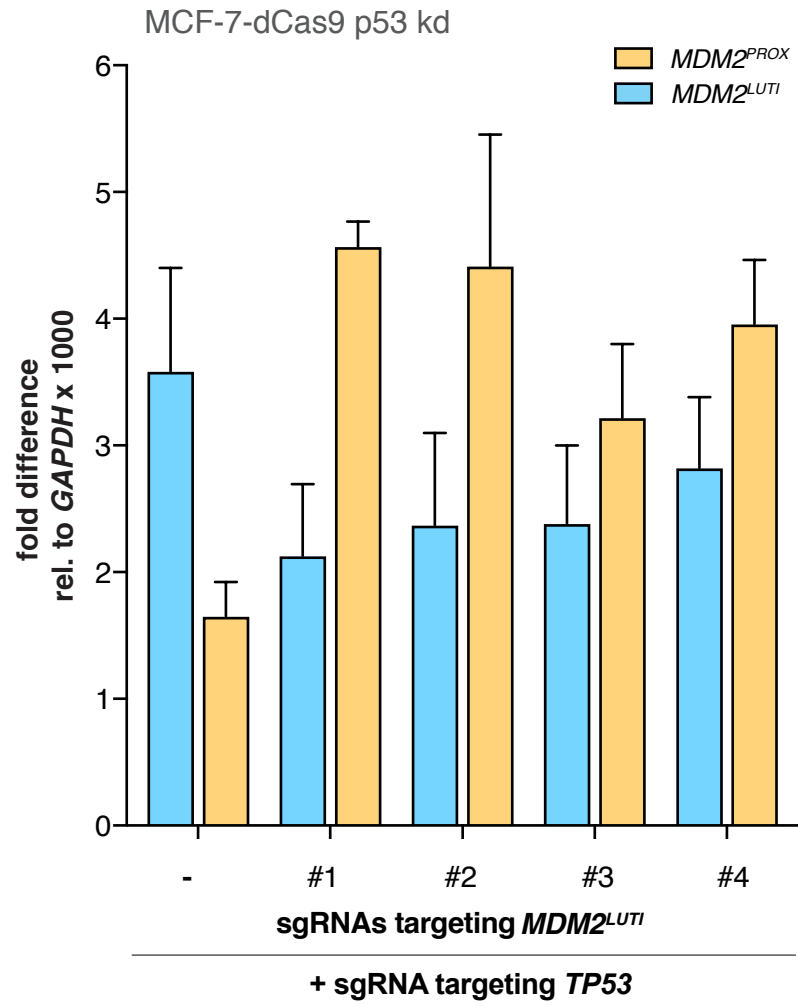
**C**
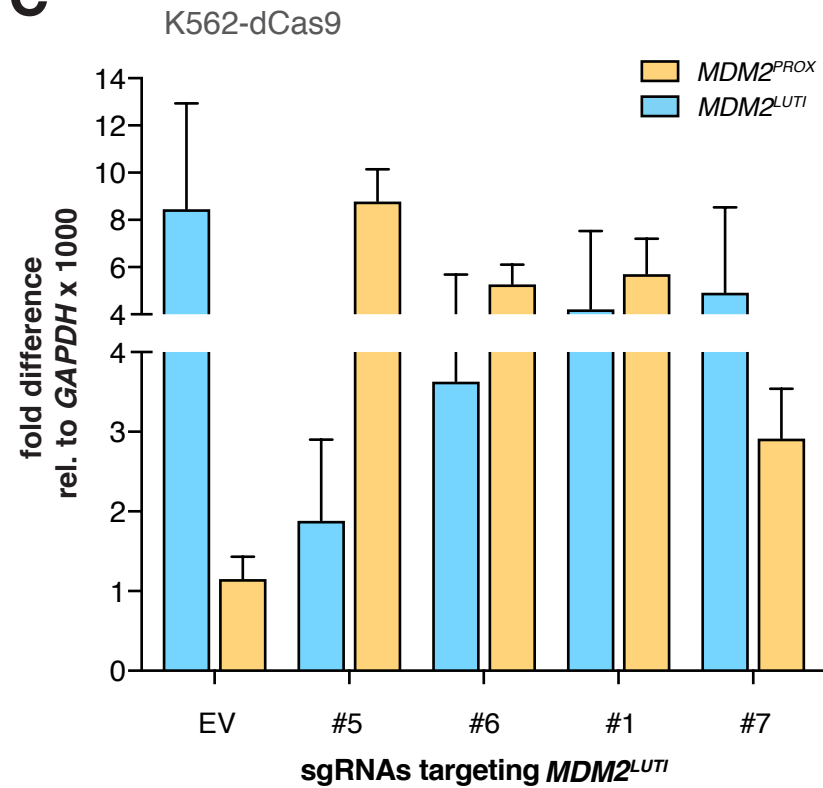

Supplement: Supplementary file 3 [file 1]

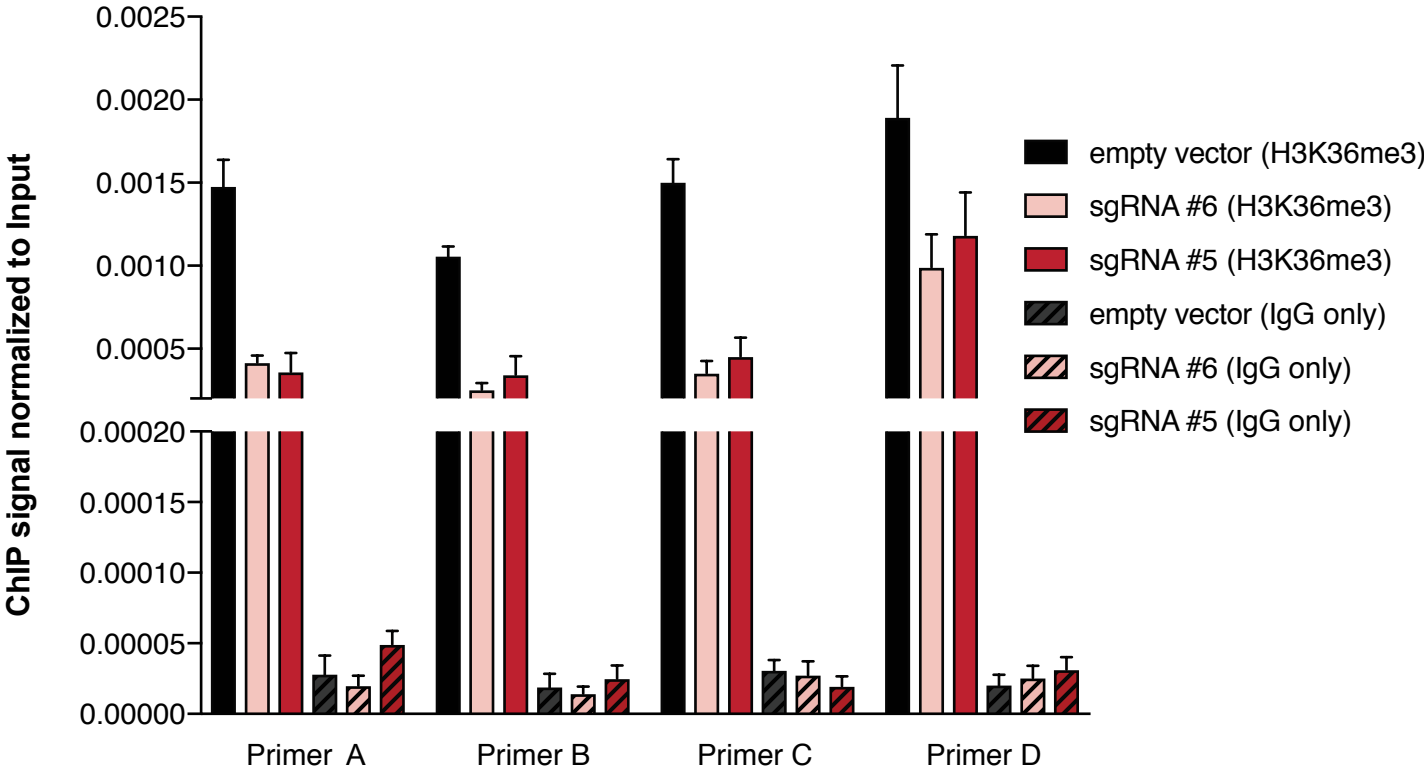

Supplement: Supplementary file 4 [file 1]

# Hollerer et al. Figure S3

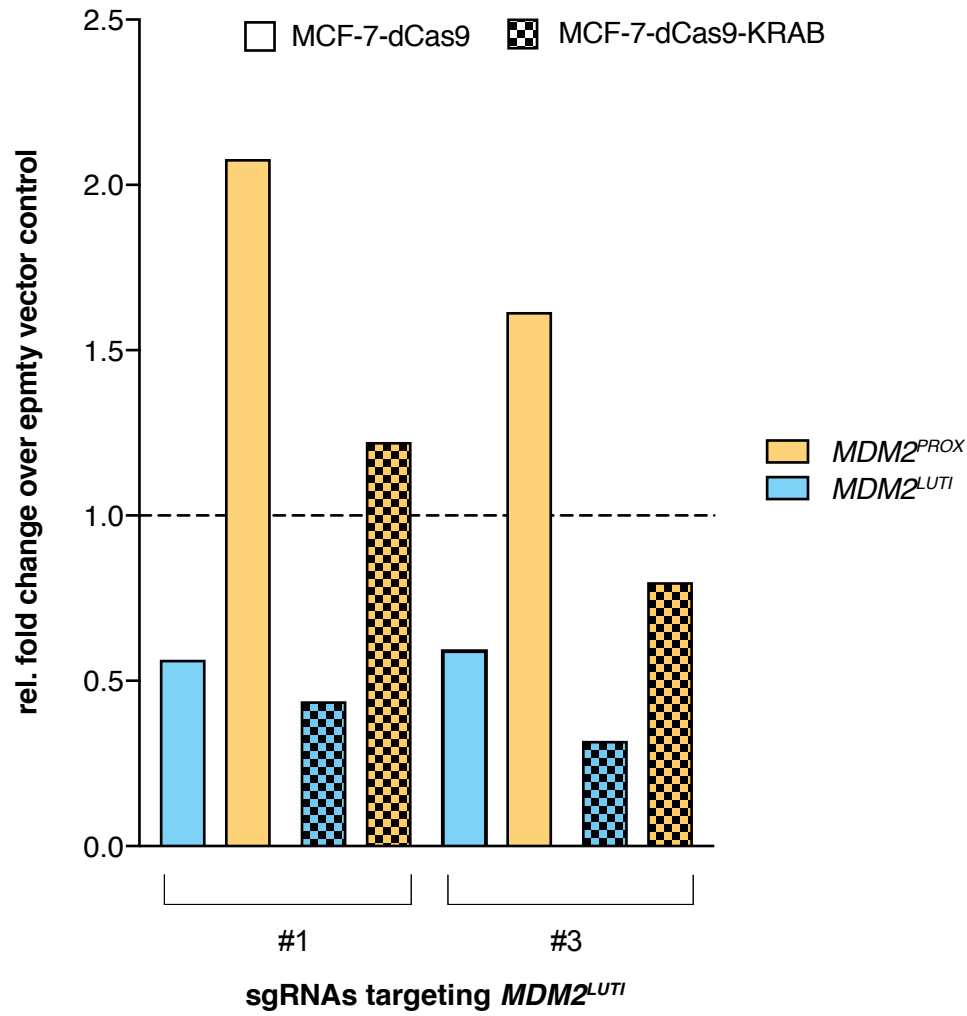

Supplement: Supplementary file 5 [file 1]

# Hollerer et al. Figure S4

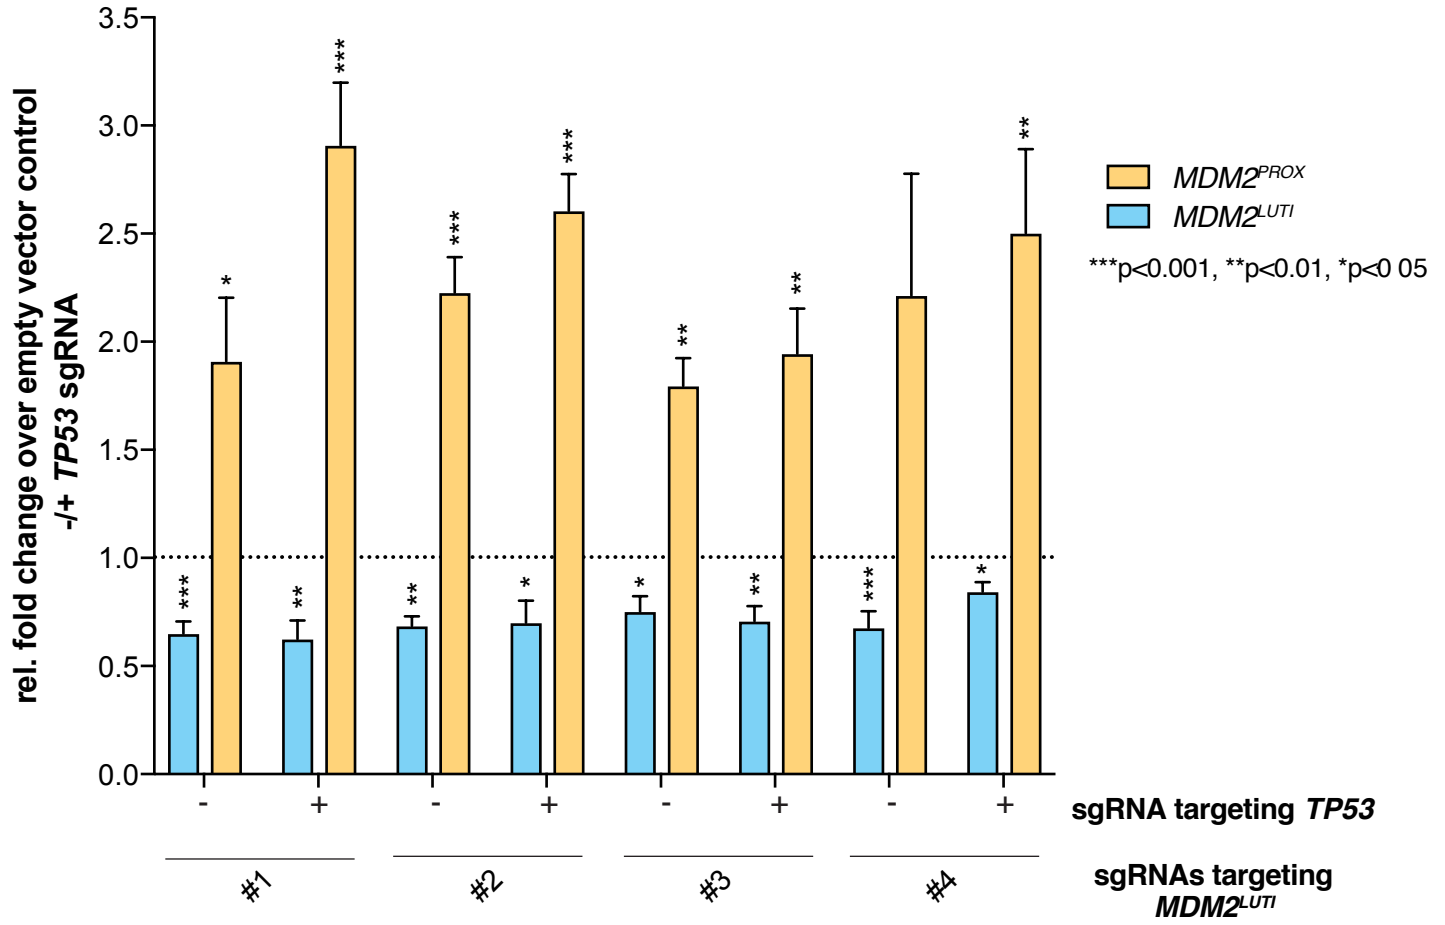

Supplement: Supplementary file 6 [file 1]
